# Supplementary material
Source: PubMed Central journal article supplement (PMC2596385)

Supplemental Figure 1.

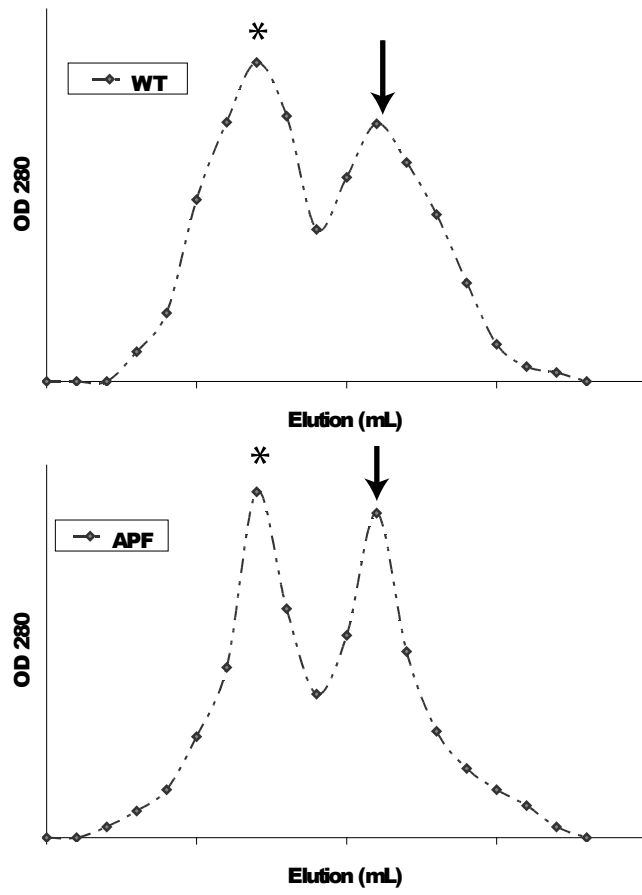

Supplement: M804970200_1.pdf [file M804970200_1.pdf]
